# Supplementary material for: A Regulatory SRNA Rli43 Is Involved in the Modulation of Biofilm Formation and Virulence in Listeria monocytogenes
Source: MDPI journal article supplement (doi:10.3390/pathogens11101137), 2022-09-30
Supplement: s1 [file s1]

## Supplementary Information

**Table S1** Determination of LD<sub>50</sub> of LM EGD-e, LM- $\Delta rli43$  and LM- $\Delta rli43-rli43$  in mice

| Group | LM EGD-e             |           |                    | LM- $\Delta rli43$  |             |                    | LM- $\Delta rli43-rli43$ |             |                    |
|-------|----------------------|-----------|--------------------|---------------------|-------------|--------------------|--------------------------|-------------|--------------------|
|       | Dose/cfu             | Mortality | LD <sub>50</sub>   | Dose/cfu            | Mortality   | LD <sub>50</sub>   | Dose/cfu                 | Mortality   | LD <sub>50</sub>   |
| 1     | 1.68×10 <sup>6</sup> | (10/10)   |                    | 2.1×10 <sup>9</sup> | 100 (10/10) |                    | 2.68×10 <sup>6</sup>     | 100 (10/10) |                    |
| 2     | 8.40×10 <sup>5</sup> | (9/10)    | 10 <sup>5.56</sup> | 2.1×10 <sup>8</sup> | 80 (8/10)   | 10 <sup>7.32</sup> | 1.34×10 <sup>6</sup>     | 80 (8/10)   | 10 <sup>5.76</sup> |
| 3     | 4.20×10 <sup>5</sup> | (6/10)    |                    | 2.1×10 <sup>7</sup> | 50 (5/10)   |                    | 6.20×10 <sup>5</sup>     | 70 (7/10)   |                    |
| 4     | 2.10×10 <sup>5</sup> | (2/10)    |                    | 2.1×10 <sup>6</sup> | 20 (2/10)   |                    | 3.10×10 <sup>5</sup>     | 20 (2/10)   |                    |
| 5     | 1.05×10 <sup>5</sup> | (0/10)    |                    | 2.1×10 <sup>5</sup> | 0 (0/10)    |                    | 1.52×10 <sup>5</sup>     | 0 (0/10)    |                    |

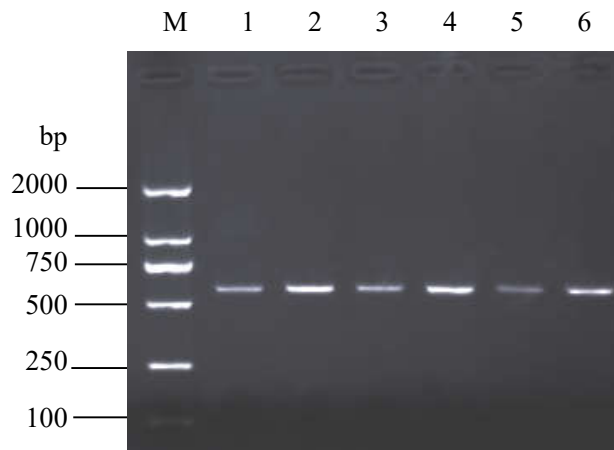

**Figure S1** Amplification of LM *rli43* gene by RT-PCR. M: DNA marker DL-2000 (2000, 1000, 750, 500, 250, 100 bp); 1-6: Amplified products of *rli43* gene by RT-PCR.

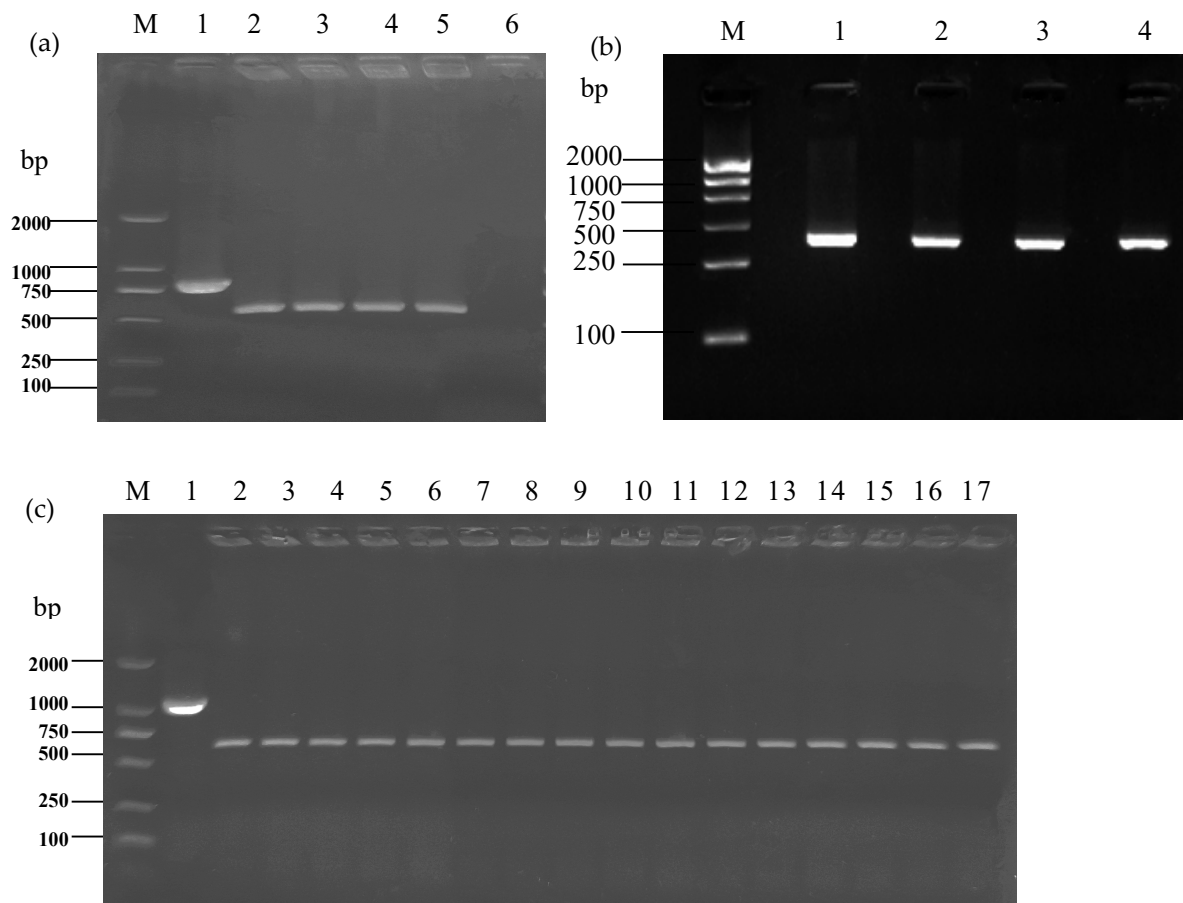

**Figure S2 Construction of LM- $\Delta rli43$  deletion and complementary strains.** (a) Screening and identification of recombinant LM- $\Delta rli43$  by PCR. M: DNA marker DL-2000 (2000, 1000, 750, 500, 250, 100 bp); 1: LM EGD-e strain (positive control); 2-5: Amplified products of recombinant LM- $\Delta rli43$  by PCR, 6: Negative control. (b) Screening and verification of complement strain LM- $\Delta rli43-rli43$  by PCR. M: DNA marker DL-2000 (2000, 1000, 750, 500, 250, 100 bp); 1-4: Amplified products of complement strain LM- $\Delta rli43-rli43$  by PCR. (c) Analysis of genetic stability of LM- $\Delta rli43$  by PCR. M: DNA marker DL-2000 (2000, 1000, 750, 500, 250, 100 bp); 1: LM EGD-e strain (positive control); 2-17: PCR Identification of LM- $\Delta rli43$  of 1, 2, 4, 5, 7, 10, 12, 13, 16, 19, 20, 22, 25, 26, 27, 30 generation.

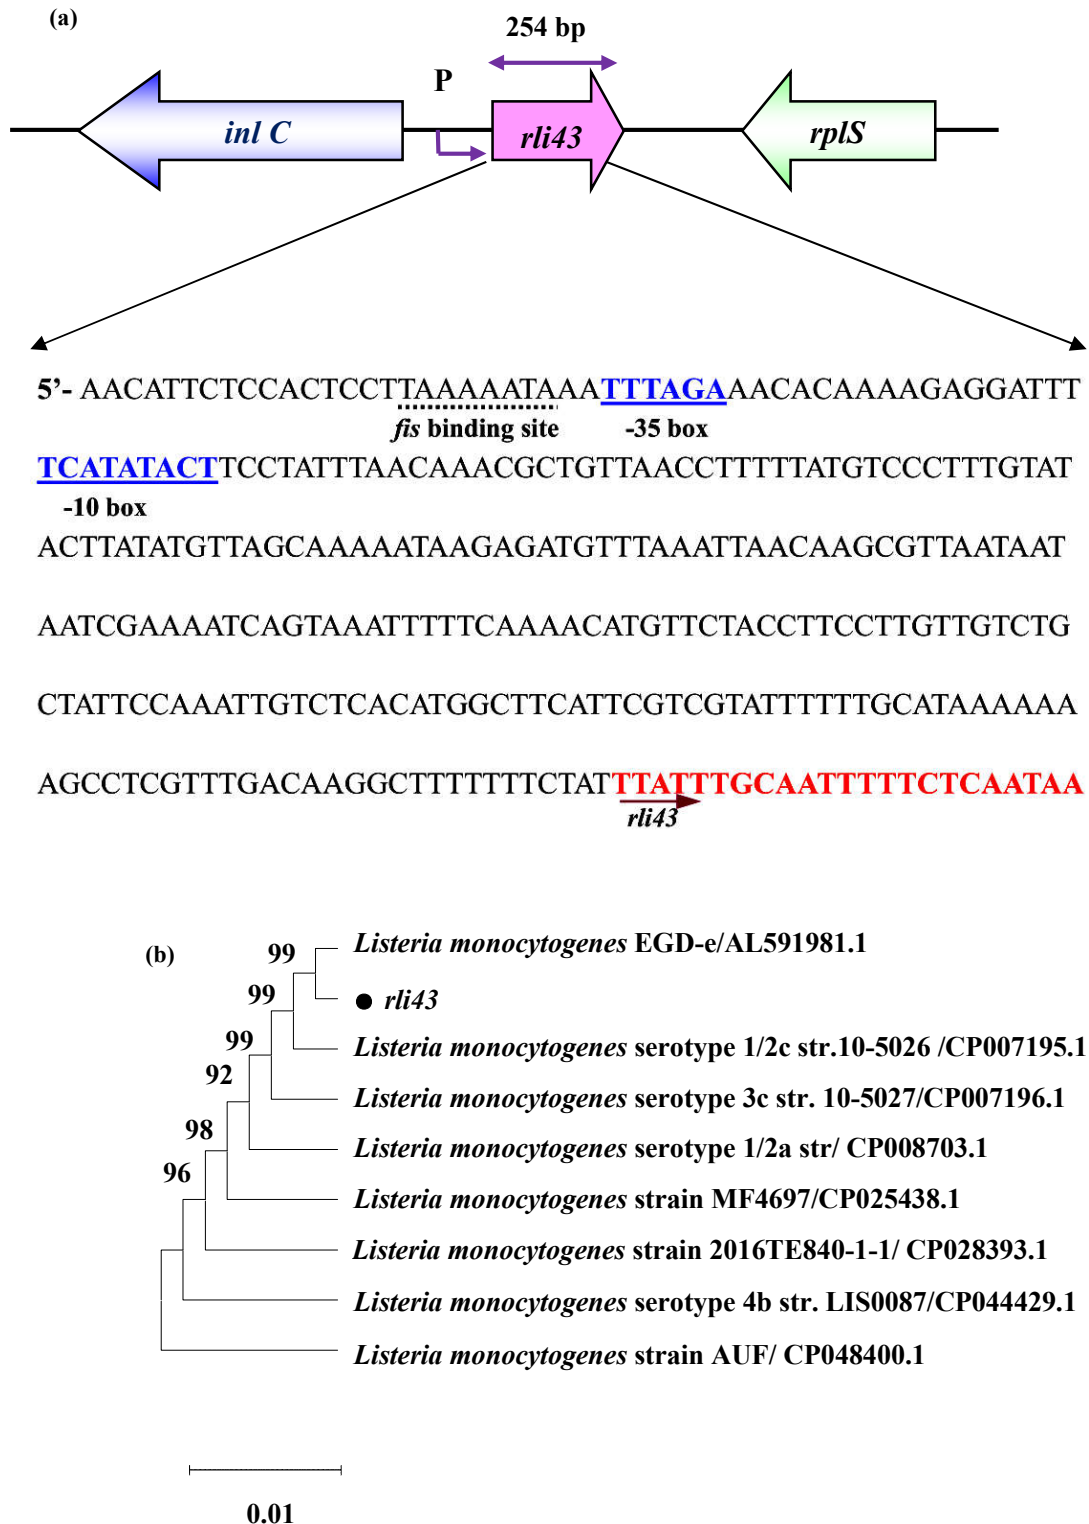

**Figure S3** Molecular characterization of *rli43* gene and its phylogenetic analysis. (a) Genetic location of *rli43* gene in the genome of LM EGD-e; (b) Phylogenetic analysis of *rli43* gene of different serotypes of LM.

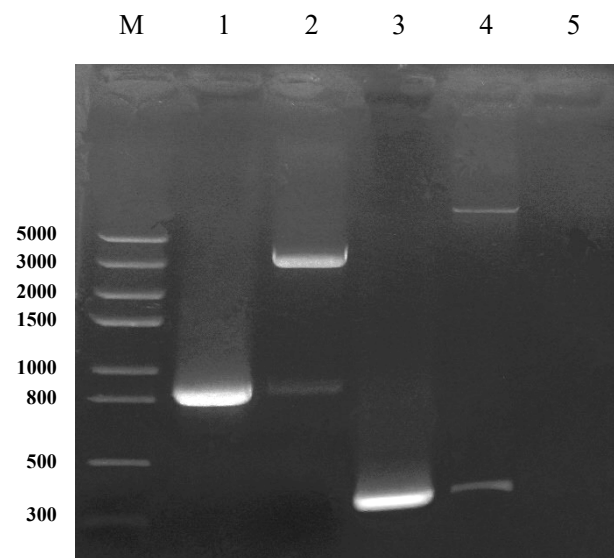

**Figure S4** Screening and identification of pMR-LacZ-*htrA* and pUT18C-*rli43* using PCR and restriction enzyme digestion. M: DNA marker DL-5000 (5000, 3000, 2000, 1500, 1000, 800, 500, 300 bp); 1: Identification of pUT18C-*rli43* by PCR; 2: pUT18C-*rli43* digested by restriction enzyme; 3: Verification of pMR-LacZ-*htrA* by PCR; 4: pMR-LacZ-*htrA* digested by restriction enzyme; 5: Negative control.
